# Supplementary material
Source: HighWire-hosted journal article supplement (https://bmjopen.bmj.com/content/8/2/e020190)
Supplement: inline-supplementary-material-2 [file inline-supplementary-material-2.pdf]

Table : Timeline for the review

| Steps of the review process | Duration |
|-----------------------------|----------|
| Literature search           | 1 week   |
| Quality appraisal           | 1 week   |
| Data extraction             | 1 month  |
| Synthesis                   | 4 weeks  |
| Writing up                  | 2 months |
